# Supplementary material for: Controllable molecular aggregation and fluorescence properties of 1,3,4-oxadiazole derivatives
Source: Royal Society of Chemistry journal article supplement (doi:10.1039/c5tc02445e), 2015-01-01
Supplement: c5tc02445e1.pdf [file c5tc02445e1.pdf]

Electronic Supplementary Information

## Controllable molecular aggregation and fluorescence properties of 1,3,4-oxadiazole derivatives

Haitao Wang,<sup>a,b</sup> Fangyi Chen,<sup>a</sup> Xiaoshi Jia,<sup>a</sup> Huimin Liu,<sup>a</sup> Xia Ran,<sup>c</sup> Mahesh  
Kumar Ravva,<sup>d</sup> Fu-Quan Bai,<sup>b</sup> Songnan Qu,<sup>e</sup> Min Li,<sup>\*,a</sup> Hong-Xing Zhang<sup>\*,b</sup>,  
Jean-Luc Brédas<sup>\*,d</sup>

<sup>a</sup> Key Laboratory of Automobile Materials (MOE) & College of Materials Science and Engineering, Jilin University, Changchun 130012, China.

<sup>b</sup> Key Laboratory of Theoretical and Computational Chemistry, Institute of Theoretical Chemistry, Jilin University, Changchun 130023, China.

<sup>c</sup> Department of Physics, School of Physics and Electronics, Henan University, Kaifeng, P. R. China

<sup>d</sup> Division of Physical Sciences and Engineering, King Abdullah University of Science and Technology – KAUST, Thuwal 23955-6900, Kingdom of Saudi Arabia.

<sup>e</sup> Key Laboratory of Excited State Processes, Changchun Institute of Optics, Fine Mechanics and Physics, Chinese Academy of Sciences, Changchun 130033, China.

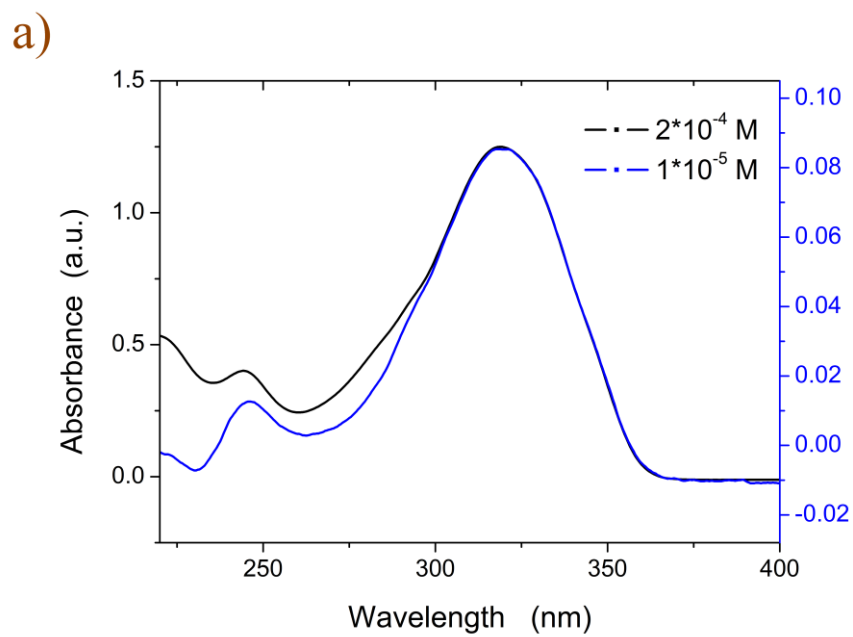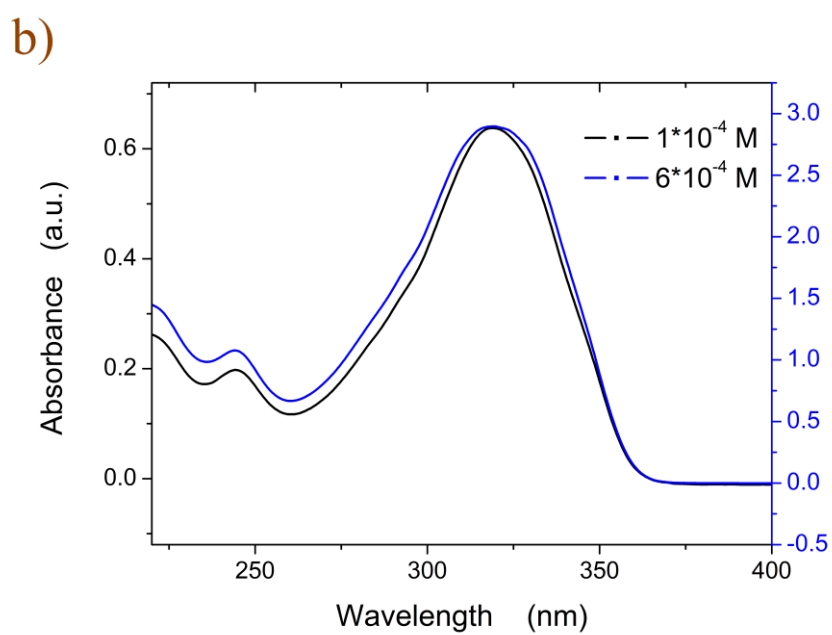

Figure S1 Comparing the UV-vis absorption spectra of BOXD-6 in tetrahedron at different concentrations.

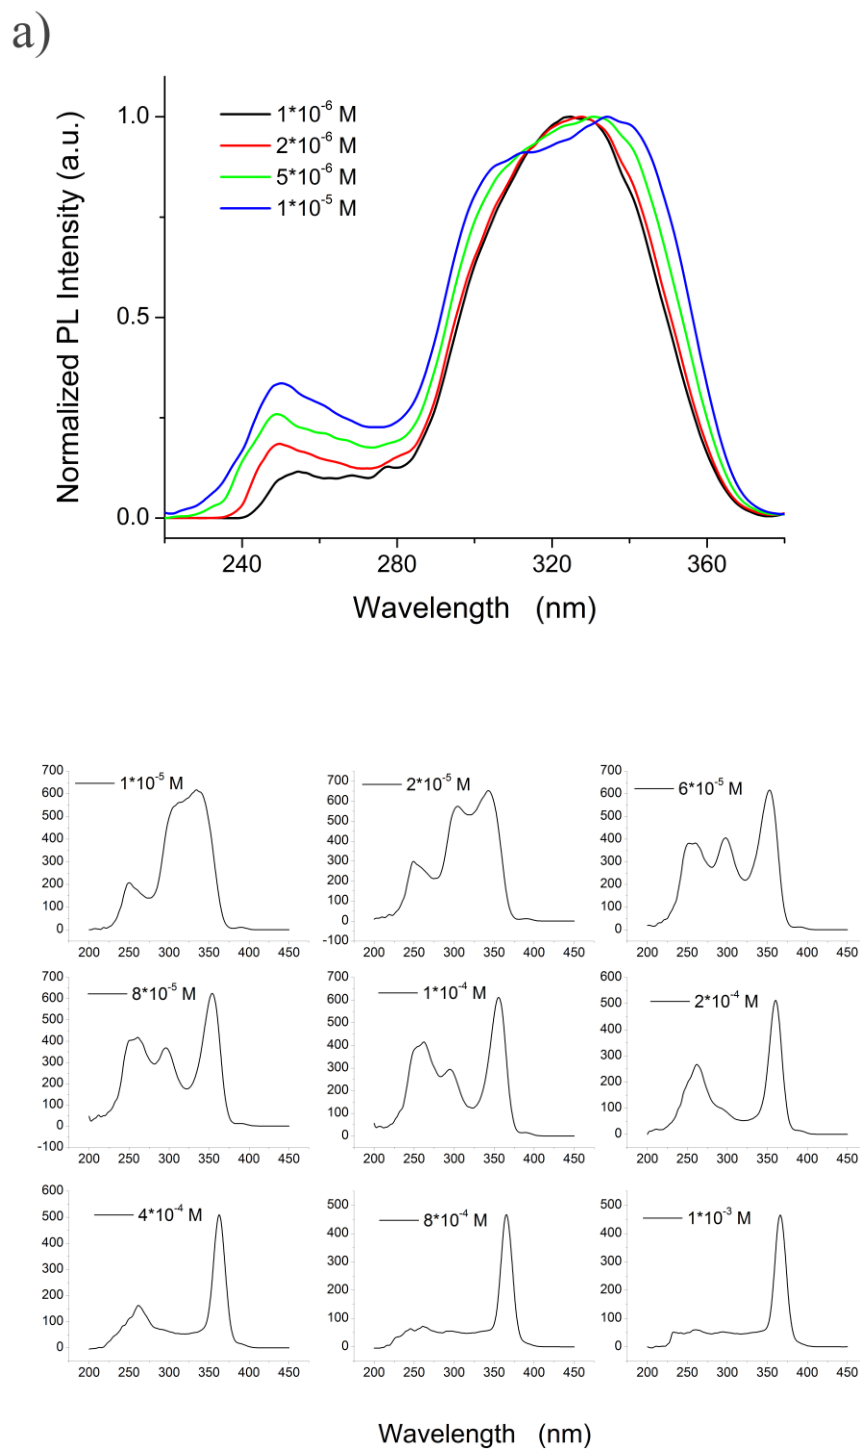

Figure S2 Excitation spectra of BOXD-6 in THF at different concentrations.

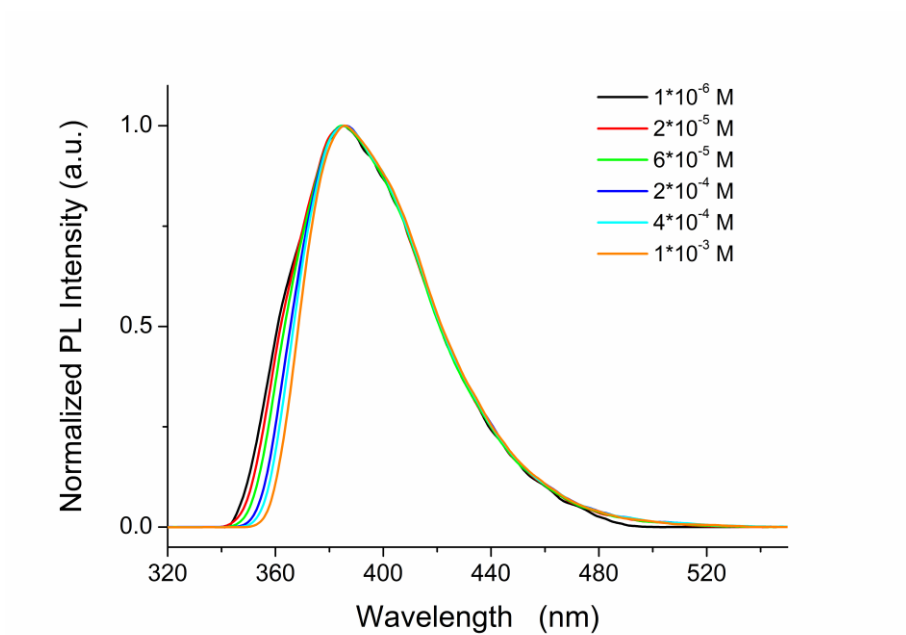

Figure S3 Normalized Photoluminescence emission spectra of BOXD-6 in THF at different concentration.

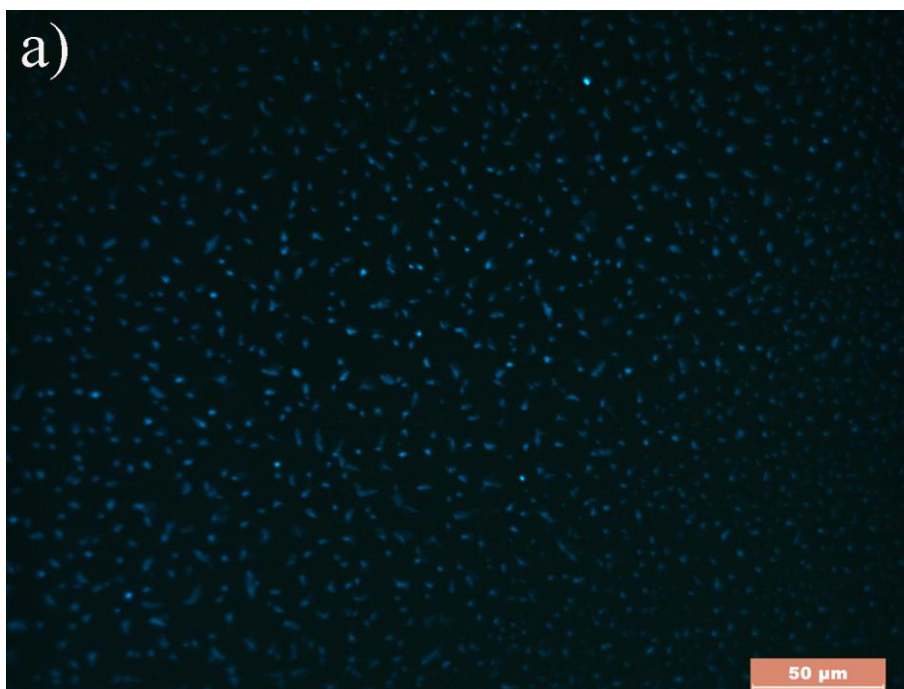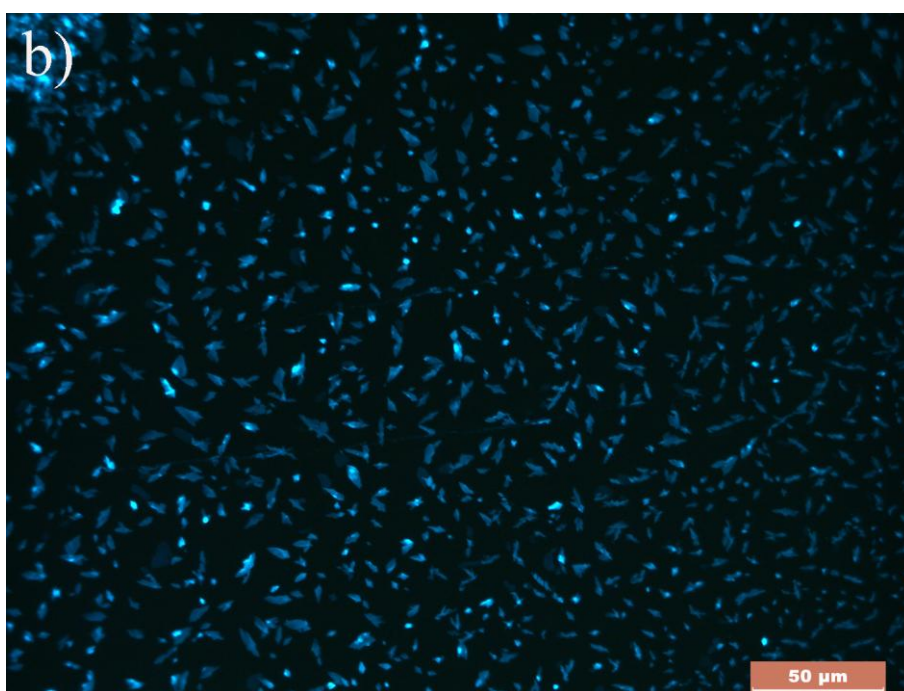

Figure S4 Fluorescence microscopic images of molecular aggregates of BOXD-6 from the THF solution at a)  $1 \times 10^{-4}$  M and b)  $1 \times 10^{-3}$  M.

---

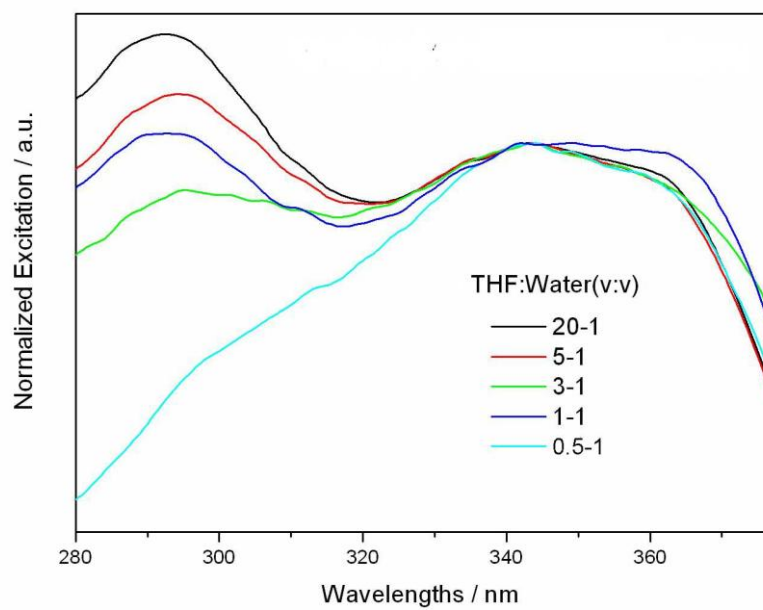

Figure S5 The effect of water ratio on excitation spectra of BOXD-6 in the precipitated particles by adding water into thick tetrahydrofuran solution.

---

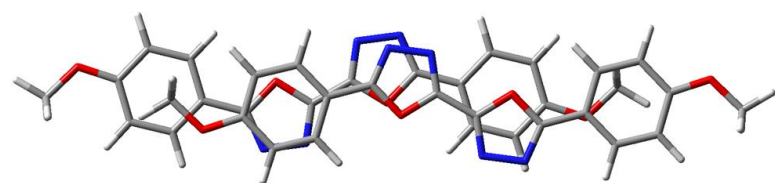

$M_{AP}1(0.4, 4.0)$   $E_{bin} = -10.98$  kcal/mol

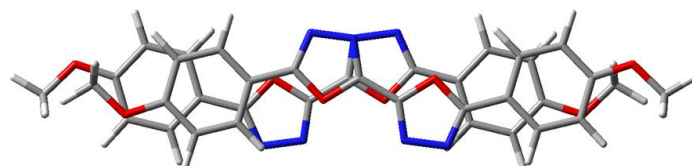

$M_{AP}2(0, 1.6)$   $E_{bin} = -10.78$  kcal/mol

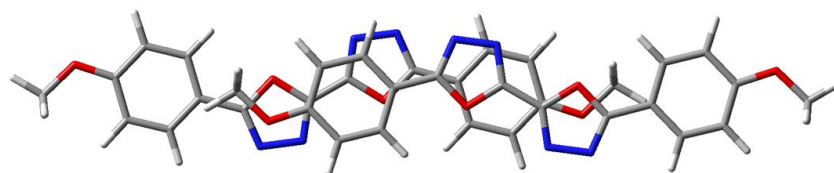

$M_{AP}3(0.2, 6.2)$   $E_{bin} = -10.50$  kcal/mol

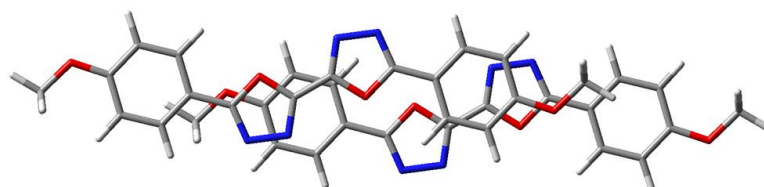

$M_P1(1.0, 5.2)$   $E_{bin} = -12.37$  kcal/mol

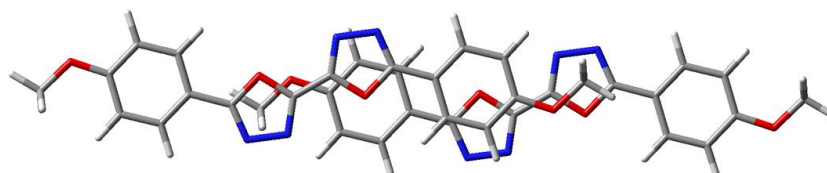

$M_P2(0.6, 7.4)$   $E_{bin} = -11.94$  kcal/mol

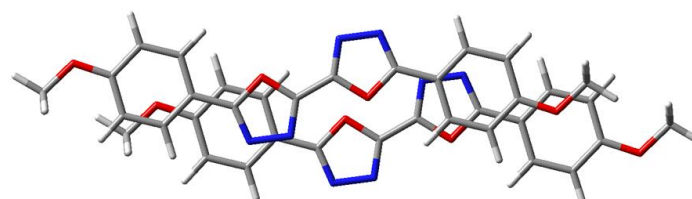

$M_P3(1.4, 2.8)$   $E_{bin} = -9.54$  kcal/mol

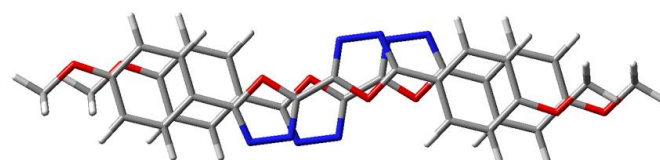

$M_P4(0, 1.4)$   $E_{bin} = -9.47$  kcal/mol

Figure S6 Energy-minimum molecular stacking structures of BOXD-1 found via PES scanning.

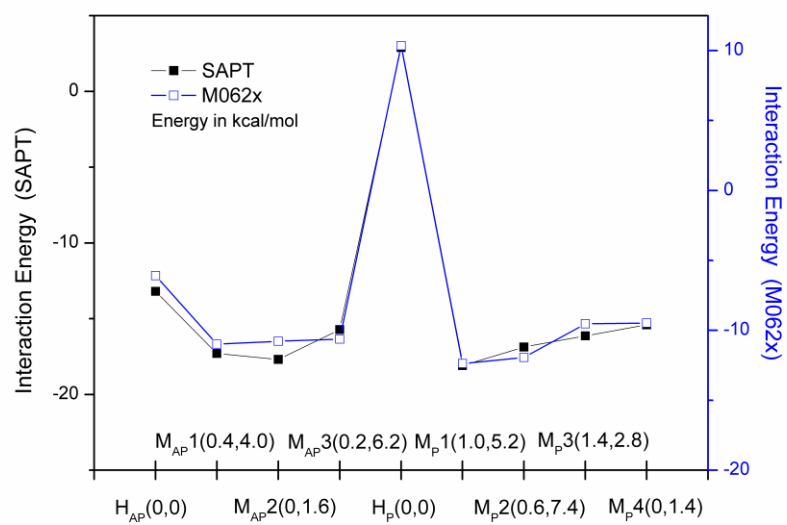

Figure S7 Calculated intermolecular interaction energy from an SAPT analysis and the Mo62x/6-31G\*\* method.
